# Supplementary material for: Validation of multivariable lung cancer risk prediction models for the personalized assignment of optimal screening frequency: a retrospective analysis of data from the German Lung Cancer Screening Intervention Trial (LUSI)
Source: PubMed Central journal article supplement — Transl Lung Cancer Res. 2021 Mar;10(3):1305–17. doi: 10.21037/tlcr-20-1173 (PMC8044498; doi:10.21037/tlcr-20-1173), 2021-03
Supplement: tlcr-10-03-1305-dss.pdf [file tlcr-10-03-1305-dss.pdf]

## Data Sharing Statement

|                     |                                                                                                                                                    |                                                                                                                                                                                                                                                                                                        |
|---------------------|----------------------------------------------------------------------------------------------------------------------------------------------------|--------------------------------------------------------------------------------------------------------------------------------------------------------------------------------------------------------------------------------------------------------------------------------------------------------|
| <b>Article Info</b> | http://dx.doi.org/10.21037/tlcr-20-1173                                                                                                            |                                                                                                                                                                                                                                                                                                        |
| <b>Item</b>         | <b>Question</b>                                                                                                                                    | <b>Authors' Response<br/>(place "-" if not applicable)</b>                                                                                                                                                                                                                                             |
| 1                   | Would you like to share data collected for your study to others?                                                                                   | Yes                                                                                                                                                                                                                                                                                                    |
| 2                   | If not, would you like to share the reason for your decision?                                                                                      | -                                                                                                                                                                                                                                                                                                      |
| 3                   | What data in particular will be shared?                                                                                                            | Anonymized data related to the participants in the LUSI study and/or parameters derived from their low-dose computed tomography images, whenever justified, upon motivated request.                                                                                                                    |
| 4                   | Any other documents will be share? Such as study protocol, statistical analysis plan, informed consent form, clinical study report, analytic code. | Study protocol, statistical analysis description                                                                                                                                                                                                                                                       |
| 5                   | When will data availability begin?                                                                                                                 | After successful publication of this submitted manuscript                                                                                                                                                                                                                                              |
| 6                   | When will data availability end?                                                                                                                   | Open end                                                                                                                                                                                                                                                                                               |
| 7                   | To whom will you share the data?                                                                                                                   | Scientific research groups, with motivated study proposal, and only upon request.                                                                                                                                                                                                                      |
| 8                   | For what type of analysis or purpose?                                                                                                              | Scientific research                                                                                                                                                                                                                                                                                    |
| 9                   | How or where can the data/documents be obtained?                                                                                                   | Through any data transfer system approved by the Data Protection department of the German Cancer Research Center (DKFZ) Heidelberg, upon completion of a data transfer agreement. For further inquiries, please contact the corresponding author: <a href="mailto:r.kaaks@dkfz.de">r.kaaks@dkfz.de</a> |
| 10                  | Any other restrictions?                                                                                                                            | No                                                                                                                                                                                                                                                                                                     |
