# Supplementary material for: Validation of multivariable lung cancer risk prediction models for the personalized assignment of optimal screening frequency: a retrospective analysis of data from the German Lung Cancer Screening Intervention Trial (LUSI)
Source: PubMed Central journal article supplement — Transl Lung Cancer Res. 2021 Mar;10(3):1305–17. doi: 10.21037/tlcr-20-1173 (PMC8044498; doi:10.21037/tlcr-20-1173), 2021-03
Supplement: tlcr-10-03-1305-supplementary.pdf [file tlcr-10-03-1305-supplementary.pdf]

## Supplementary Methods

### *Nodule management protocol*

According to the protocol of the LUSI, participants with nodules newly-detected by means of LDCT, independently of the screening round, were assigned to groups according to the nodule's largest diameter: (I) no observed nodules or all observed nodules less than 5 mm, (II) 5–7 mm, (III) 8–<10 mm and (IV) 10 mm or larger. Depending on the group to which the participants were assigned, they were: (I) sent back to annual screening, invited for a follow-up LDCT-screen after (II) 6 or (III) 3 months, or (IV) sent to diagnostic work-up immediately. In further rounds (2–5), management of previously observed nodules was based on nodule growth: (I) no growth or volume doubling time (VDT) more than 600 days (back to annual screening), (II) VDT within 400–600 days (LDCT after 6 months) or (III) VDT 400 days or less (immediate confirmatory diagnostic work-up). Immediate work-up was done by a cooperating pulmonologist, who decided whether further diagnostic procedures [X-ray, CT, PET, bronchoscopy, video-assisted thoracoscopic surgery (VATS) or biopsy] or treatment (antibiotics, short-term follow-up) were to be indicated.

### *Conversion of the education level categories between the German and US systems for the LCRAT+CT model.*

The categories of the variable “highest education level” defined for the LCRAT+CT model according to the US education system were linked to the available categories from the LUSI questionnaires, which were created according to the German education system, according to the following table (*Table S1*):

**Table S1** Conversion between German and US education level categories

| US Education System             | German Education System                                                                                                                                                                                                                                                                                                                            |
|---------------------------------|----------------------------------------------------------------------------------------------------------------------------------------------------------------------------------------------------------------------------------------------------------------------------------------------------------------------------------------------------|
| 1≤12 grade                      | kein Schulabschluss (no school certificate)<br>Volksschulabschluss/Hauptschulabschluss (Certificate of Secondary Education)<br>Mittlere Reife/Realschulabschluss (General Certificate of Secondary Education)<br>keine berufliche Ausbildung und nicht in beruflicher Ausbildung (no vocational training and not currently in vocational training) |
| 2=High school graduate          | Noch in Ausbildung (Auszubildender, Student) (in vocational training, student)                                                                                                                                                                                                                                                                     |
| 3=Post high school, no college  | Fachhochschulreife/Fachoberschulabschluss (high school diploma)<br>Allgemeine Hochschulreife/Abitur (high school diploma/academic diploma)<br>Lehre (kaufmännisch) [vocational training (commercial)]<br>Lehre (gewerblich, technisch, landwirtschaftlich) [vocational training (industrial, technical, agricultural)]                             |
| 4=Associate degree/some college | Berufsfach-/Handelsschulabschluss (technical school diploma)<br>Fach-/Meister-/Technikerschule, Berufs-/Fachakademie (technical college/ university of cooperative education)                                                                                                                                                                      |
| 5=Bachelors degree              | Bakkalaureus (bachelors degree)                                                                                                                                                                                                                                                                                                                    |
| 6=Graduate school               | Fachhochschule (Ingenieurschule) (university of applied sciences)<br>Universität, Hochschule (university, college)                                                                                                                                                                                                                                 |

**Table S2** Nodule management protocol

| Newly observed nodules (first screening round or new in subsequent rounds) |                                       | Known nodules (early recalls or subsequent screening rounds) |                           |
|----------------------------------------------------------------------------|---------------------------------------|--------------------------------------------------------------|---------------------------|
| Outcome by nodule size                                                     | Action                                | Outcome by nodule growth                                     | Action                    |
| without abnormality or nodules <5 mm                                       | back to routine screening (12 months) | –                                                            | –                         |
| nodules $\geq 5$ and <8 mm                                                 | early recall (6 months)               | >600 VDT                                                     | back to routine screening |
|                                                                            |                                       | 400–600 VDT D <7.5 mm                                        | early recall (6 months)   |
| Nodules $\geq 8$ and $\leq 10$ mm                                          | Early recall (3 months)               | D $\geq 7.5$ –10 mm                                          | Early recall (3 months)   |
| Nodules >10 mm/Not highly suspicious                                       |                                       | $\leq 400$ VDT or D >10 mm                                   | Immediate recall          |
| Highly suspicious                                                          | Immediate recall                      | Malignant                                                    | Treatment                 |
|                                                                            |                                       | Non-malignant                                                | Back to routine screening |

mm: millimeters, VDT: volume doubling time; D: diameter.

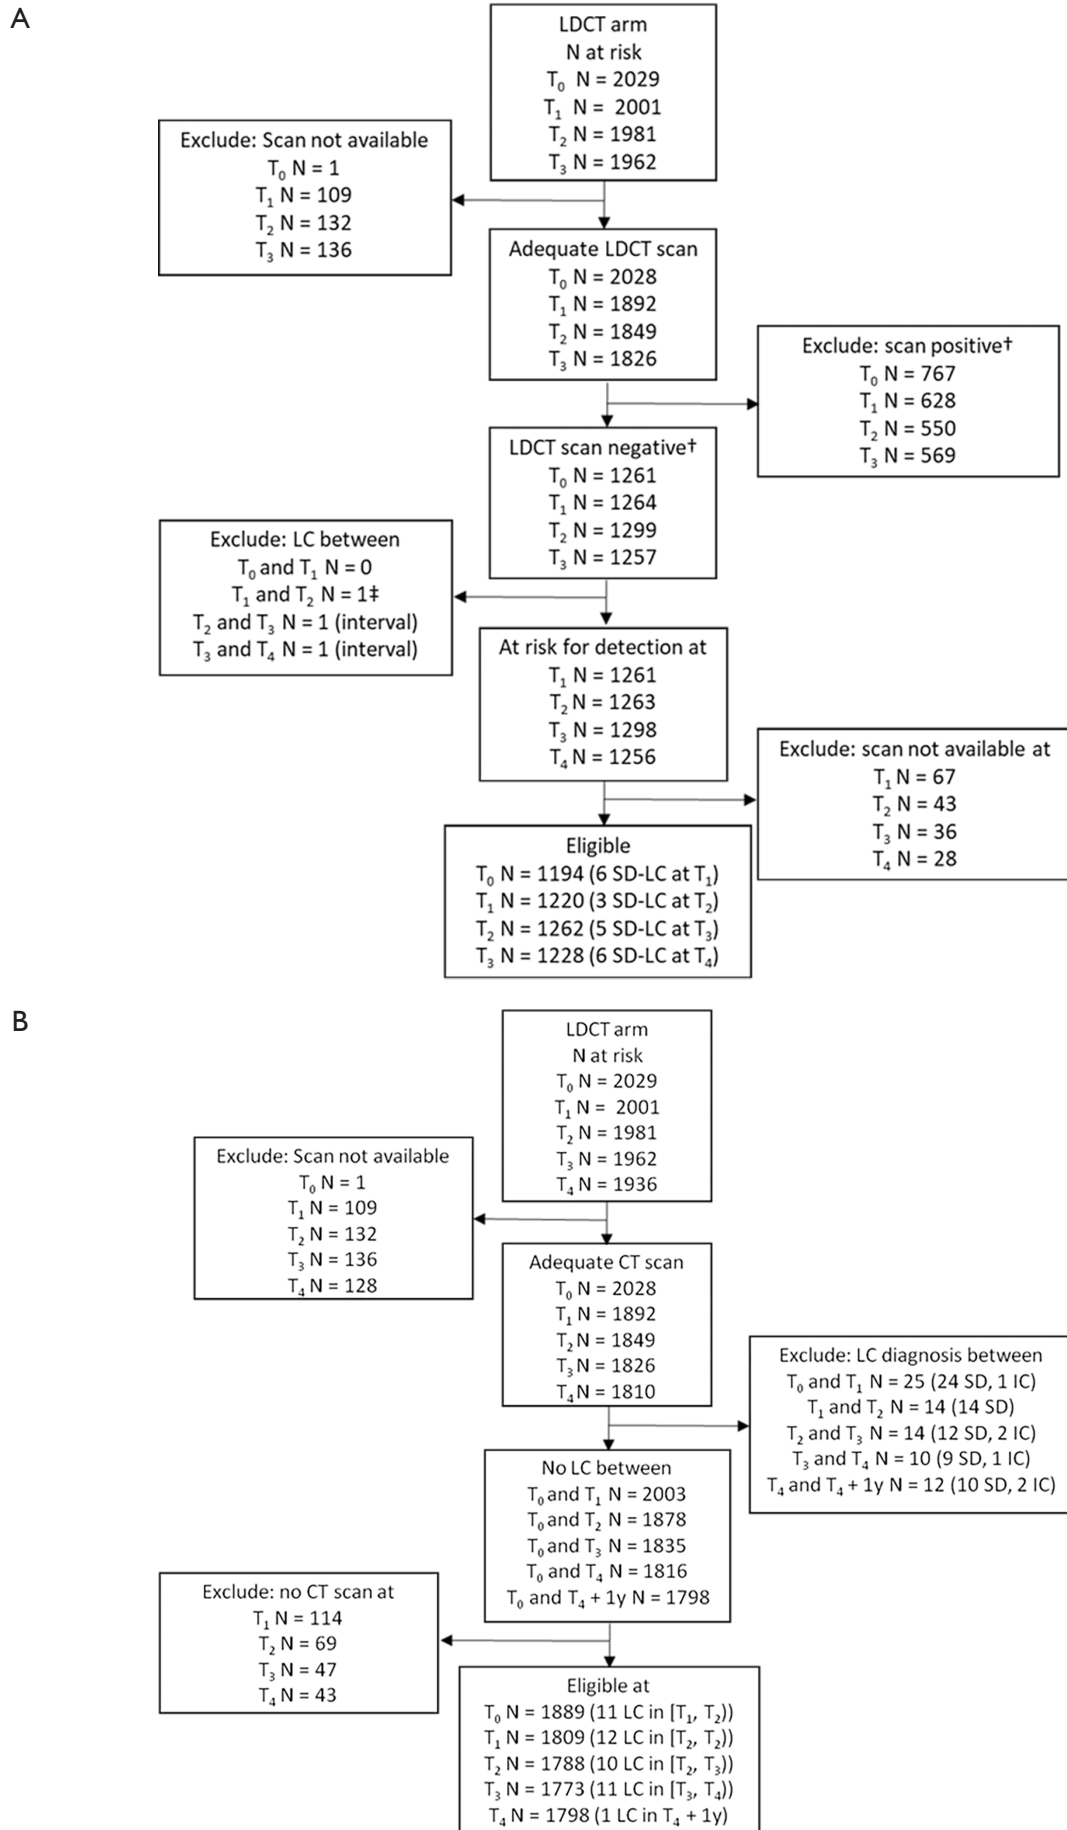

**Figure S1** Participant selection flow charts for the validation of the selected models: (A) LCRAT + CT model, (B) Polynomial model. †NLSST criteria positive: at least one non-calcified nodule  $\geq 4$  mm in longest diameter; negative: absence of non-calcified nodules  $\geq 4$  mm in longest diameter. ‡The participant was excluded because of a lung cancer diagnosis based on additional findings in the absence of non-calcified nodules on LDCT scan images. LDCT: low-dose computed tomography; LC: lung cancer; SD: screen-detected; IC: interval cancer; y: year.

**Table S3** Coefficients of the LCRAT, LCRAT+CT and Polynomial models

| LCRAT                               |                     | Polynomial model                                                         |                     |
|-------------------------------------|---------------------|--------------------------------------------------------------------------|---------------------|
| Predictor variable                  | $\beta$ coefficient | Predictor variable                                                       | $\beta$ coefficient |
| Sex (female)                        | -0.08057            | Model constant                                                           | -28.15              |
| Race (black/African-American)       | 0.217892            | Age (y)                                                                  | 0.5845              |
| Race (Hispanic)                     | -0.43413            | Age <sup>2</sup> (y <sup>2</sup> )                                       | -0.004026           |
| Race (other ethnicity)              | -0.39556            | Prior diagnosis of cancer                                                | 0.5555              |
| Education (trend)                   | -0.07143            | Smoking status (active)                                                  | 0.5046              |
| Number of parents with lung cancer  | 0.4183              | Pack-years (y)                                                           | 0.03922             |
| Lung disease (COPD or emphysema)    | 0.563422            | Pack-years <sup>2</sup> (y <sup>2</sup> )                                | -0.0001632          |
| BMI ( $\leq 18.5$ )                 | 0.060925            | Prior diagnosis of COPD                                                  | 0.4144              |
| CPD ( $>20$ )                       | 0.310609            | Longest perpendicular diameter (mm)                                      | 0.09962             |
| Pack years [30, 40)                 | 0.491254            | Longest perpendicular diameter <sup>2</sup> (mm <sup>2</sup> )           | -0.0006524          |
| Pack years [40, 50)                 | 0.562334            | Presence of non-solid nodule                                             | 0.4217              |
| Pack years ( $\geq 50$ )            | 0.715752            | Presence of part solid nodule                                            | 0.9108              |
| log(age)                            | 4.386866            | Presence of nodule in upper lobe                                         | 0.4685              |
| log(BMI)                            | -0.72386            | Presence of spiculated nodule                                            | 0.7512              |
| log(years quit +1)                  | -0.3209             | Nodule count per scan (per additional nodule)                            | 0.5128              |
| Years smoked                        | 0.024002            | Nodule count per scan <sup>2</sup> (per additional nodule <sup>2</sup> ) | -0.1947             |
| LCRAT + CT                          |                     |                                                                          |                     |
| Predictor variable                  | Exponent            |                                                                          |                     |
| Neither emphysema nor consolidation | 1.08                |                                                                          |                     |
| Emphysema                           | 0.96                |                                                                          |                     |
| Consolidation                       | 0.77                |                                                                          |                     |

LCRAT: Lung Cancer Risk Assessment Tool; y: years; COPD: Chronic obstructive pulmonary disease; BMI: body mass index; CPD: cigarettes per day.

**Table S4** Baseline characteristics of eligible participants and their pulmonary nodules.

|                                    | Participants eligible for the LCRAT+CT model |                                     |        |                         | Participants eligible for the Polynomial model |                                            |       |                         |
|------------------------------------|----------------------------------------------|-------------------------------------|--------|-------------------------|------------------------------------------------|--------------------------------------------|-------|-------------------------|
|                                    | No Lung cancer                               | LC cancer in any round <sup>†</sup> | P      | Total                   | No Lung cancer                                 | Lung cancer at T <sub>1</sub> <sup>‡</sup> | P     | Total                   |
| N                                  | 1482                                         | 24                                  |        | 1506                    | 1878                                           | 11                                         |       | 1889                    |
| Sex (M/F)                          | 942/540 (63.6/36.4)                          | 18/6 (75.0/25.0)                    | 0.346  | 960/546 (63.7/36.3)     | 1229/649 (65.4/34.6)                           | 9/2 (81.8/18.2)                            | 0.411 | 1238/651 (65.5/34.5)    |
| Age [median, range]                | 56.70<br>[50.30, 71.80]                      | 60.20<br>[54.60, 70.00]             | <0.001 | 56.80<br>[50.30, 71.80] | 56.80<br>[50.30, 71.90]                        | 60.20<br>[54.60, 69.40]                    | 0.013 | 56.80<br>[50.30, 71.90] |
| BMI (mean, (SD))                   | 26.94 (4.20)                                 | 25.73 (3.69)                        | 0.163  | 26.92 (4.19)            | 26.91 (4.14)                                   | 25.95 (3.28)                               | 0.444 | 26.90 (4.14)            |
| COPD or emphysema (no/yes)         | 1465/17<br>(98.9/1.1)                        | 23/1<br>(95.8/4.2)                  | 0.687  | 1488/18 (98.8/1.2)      | 1636/242 (87.1/12.9)                           | 8/3<br>(72.7/27.3)                         | 0.334 | 1644/245<br>(87.0/13.0) |
| Asbestos exposure (no/yes)         | 1390/92(93.8/6.2)                            | 23/1<br>(95.8/4.2)                  | -      | 1413/93 (93.8/6.2)      | 1819/59 (96.9/3.1)                             | 11 (100.0/0.0)                             | 1.000 | 1830/59 (96.9/3.1)      |
| Education                          |                                              |                                     | 0.989  |                         |                                                |                                            | 0.916 |                         |
| < 12 grade                         | 119 (8.0)                                    | 2 (8.3)                             |        | 121 (8.0)               | 146 (7.8)                                      | 1 (9.1)                                    |       | 147 (7.8)               |
| High school graduate               | 1 (0.1)                                      | 0 (0.0)                             |        | 1 (0.1)                 | 2 (0.1)                                        | 0 (0.0)                                    |       | 2 (0.1)                 |
| Post high school, no college       | 795 (53.6)                                   | 14 (58.3)                           |        | 809 (53.7)              | 1014 (54.0)                                    | 7 (63.6)                                   |       | 1021 (54.0)             |
| Associate degree/some college      | 305 (20.6)                                   | 4 (16.7)                            |        | 309 (20.5)              | 392 (20.9)                                     | 1 (9.1)                                    |       | 393 (20.8)              |
| Graduate school                    | 262 (17.7)                                   | 4 (16.7)                            |        | 266 (17.7)              | 324 (17.3)                                     | 2 (18.2)                                   |       | 326 (17.3)              |
| Emphysema in scan (no/yes)         | 943/539 (63.6/36.4)                          | 11/13 (45.8/54.2)                   | 0.114  | 954/552 (63.3/36.7)     | 1159/719 (61.7/38.3)                           | 5/6 (45.5/54.5)                            | 0.427 | 1164/725 (61.6/38.4)    |
| Consolidation in scan (no/yes)     | 1475/7 (99.5/0.5)                            | 24/0 (100.0/0.0)                    | 1.000  | 1499/7 (99.5/0.5)       | 1867/11 (99.4/0.6)                             | 11/0 (100.0/0.0)                           | 1.000 | 1878/11 (99.4/0.6)      |
| Former smokers                     | 574                                          | 6                                   |        | 580                     | 714                                            | 3                                          |       | 717                     |
| Years of smoking [mean (SD)]       | 18.27 (4.37)                                 | 20.00 (2.74)                        | 0.333  | 18.28 (4.36)            | 18.34 (4.40)                                   | 19.17 (2.89)                               | 0.745 | 18.34 (4.39)            |
| Years since quitting [mean (SD)]   | 4.90 (2.76)                                  | 4.33 (2.70)                         | 0.620  | 4.89 (2.76)             | 4.85 (2.76)                                    | 5.50 (3.46)                                | 0.684 | 4.85 (2.76)             |
| Cigarettes per day [mean (SD)]     | 26.24 (12.13)                                | 27.50 (17.32)                       | 0.801  | 26.25 (12.17)           | 26.60 (12.29)                                  | 30.83 (7.64)                               | 0.552 | 26.62 (12.27)           |
| Pack-years [mean (SD)]             | 24.00 (13.07)                                | 28.33 (20.81)                       | 0.423  | 24.05 (13.15)           | 24.41 (13.14)                                  | 28.85 (3.77)                               | 0.559 | 24.43 (13.11)           |
| Current smokers                    | 908                                          | 18                                  |        | 926                     | 1164                                           | 8                                          |       | 1172                    |
| Years of smoking [mean (SD)]       | 34.87 (4.89)                                 | 37.50 (5.94)                        | 0.025  | 34.92 (4.92)            | 35.03 (4.91)                                   | 38.75 (3.54)                               | 0.033 | 35.05 (4.91)            |
| Years since quitting [mean (SD)]   | 0.00 (0.00)                                  | 0.00 (0.00)                         | -      | 0.00 (0.00)             | 0.00 (0.00)                                    | 0.00 (0.00)                                | -     | 0.00 (0.00)             |
| Cigarettes per day [mean (SD)]     | 20.40 (8.42)                                 | 21.94 (12.11)                       | 0.444  | 20.43 (8.50)            | 20.55 (8.60)                                   | 25.62 (13.35)                              | 0.098 | 20.59 (8.64)            |
| Pack-years [mean (SD)]             | 35.85 (16.02)                                | 41.56 (27.02)                       | 0.141  | 35.96 (16.30)           | 36.24 (16.39)                                  | 50.55 (29.97)                              | 0.015 | 36.34 (16.54)           |
| With at least one NCN              |                                              |                                     |        |                         | 895                                            | 6                                          |       | 901                     |
| Longest diameter [mean (SD)]       |                                              |                                     |        |                         | 5.75 (3.62)                                    | 6.15 (2.40)                                | 0.788 | 5.75 (3.62)             |
| Perpendicular diameter [mean (SD)] |                                              |                                     |        |                         | 3.85 (1.75)                                    | 4.47 (1.53)                                | 0.386 | 3.85 (1.74)             |
| In upper lobe (%)                  |                                              |                                     |        |                         | 524 (58.5)                                     | 2 (33.3)                                   | 0.405 | 526 (58.4)              |
| Solid (%)                          |                                              |                                     |        |                         | 853 (95.3)                                     | 6 (100.0)                                  | 1.000 | 859 (95.3)              |
| Spiculated (%)                     |                                              |                                     |        |                         | 37 (4.1)                                       | 0 (0.0)                                    | 1.000 | 37 (4.1)                |

<sup>†</sup>Lung cancer screen-detected at any annual screening appointment. Not necessarily screen-detected at next-screen following a negative one. <sup>‡</sup> Lung cancer screen-detected at round 2 (T<sub>1</sub>) or diagnosed in between round 2 (T<sub>1</sub>) and round 3(T<sub>2</sub>). SD: standard deviation; BMI: body mass index; COPD: chronic obstructive pulmonary disease; LC: lung cancer.

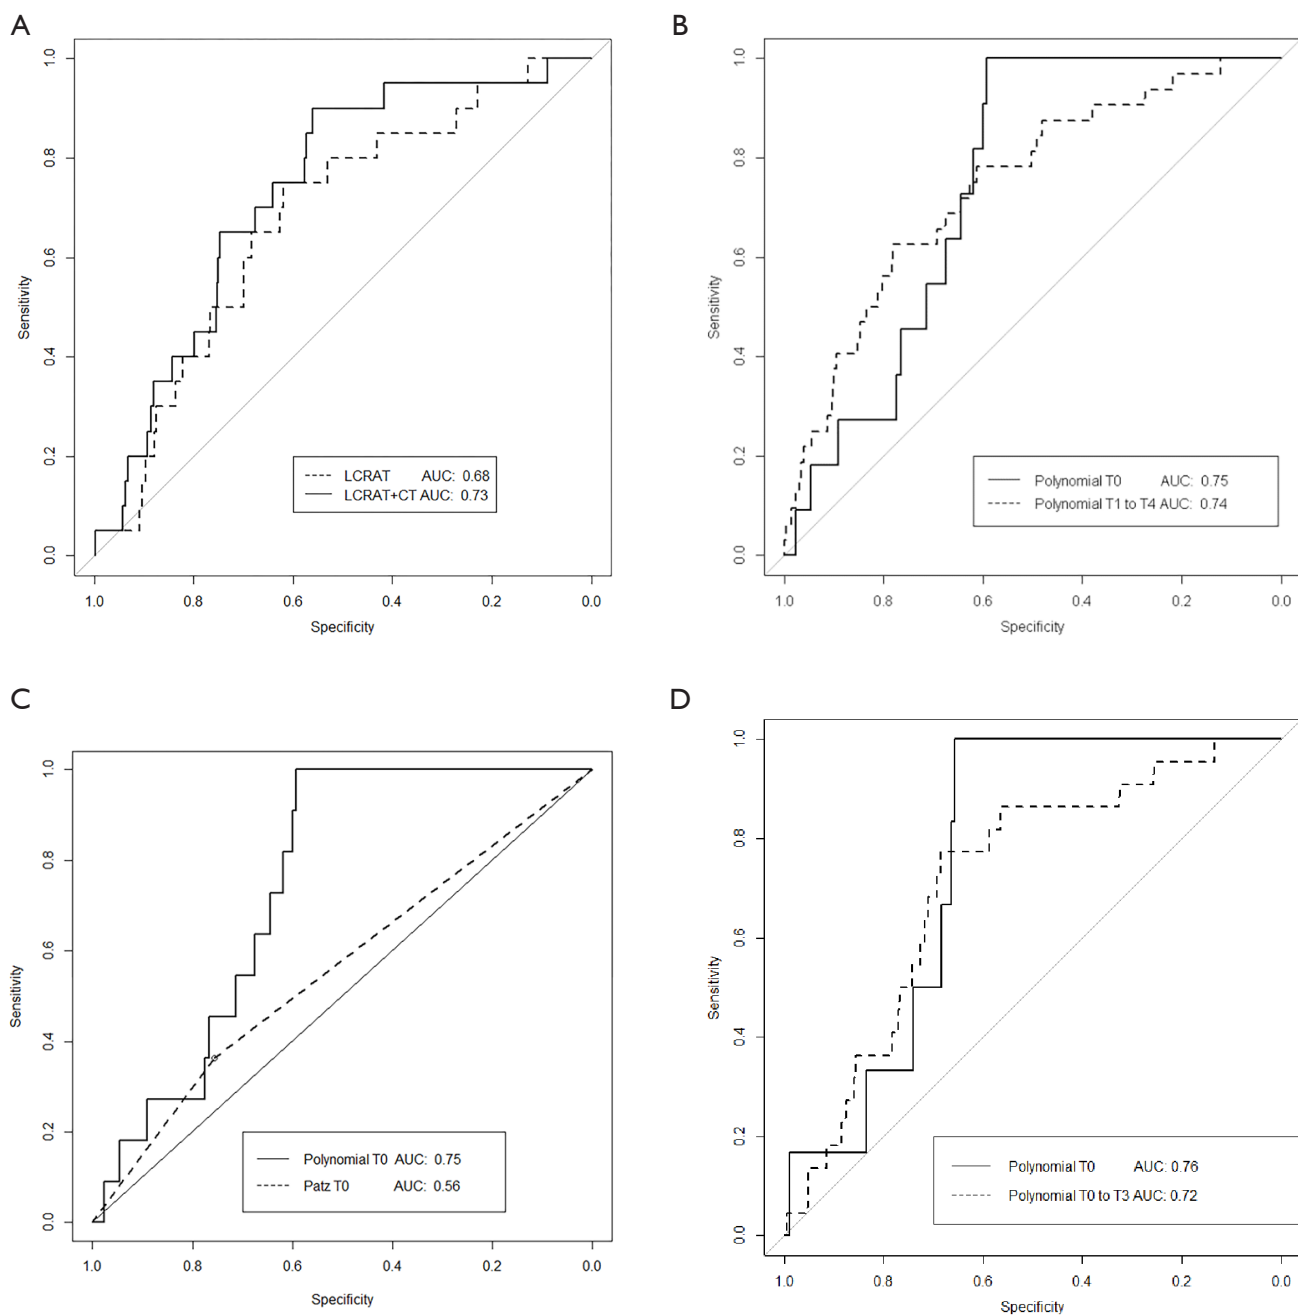

**Figure S2** ROC curves for the selected models: (A) LCRAT (1-year) and LCRAT+CT†, (B) Polynomial model‡, (C) Polynomial and Patz model applied to T0 data and d) Polynomial model applied to data from participants eligible for the LCRAT+CT model. LCRAT: Lung Cancer risk Assessment Tool; AUC: Area under the Curve. † Applied to data from LCRAT+CT-eligible participants from T0 to T3. ‡ Applied to data from Polynomial model eligible participants from T0 or T1 to T4.

**Table S5** Potential effect of risk thresholds from the Polynomial model in participants from all screening rounds of the LUSI Trial, eligible for the LCRAT+CT model

| Percentile of risk     | Polynomial risk | Candidates for Longer Interval, N (%; 95% CI) | Delayed cancer detections, N (%; 95% CI) | False positives avoided/delayed, N (%; 95% CI) | Indeterminates avoided/delayed, N (%; 95% CI) | Sens (%; 95% CI)  | Spec (%; 95% CI)  | PPV (PPV, 95% CI) | NPV (NPV, 95% CI) | PLR (PLR; 95% CI)  | NLR (NLR; 95% CI) |
|------------------------|-----------------|-----------------------------------------------|------------------------------------------|------------------------------------------------|-----------------------------------------------|-------------------|-------------------|-------------------|-------------------|--------------------|-------------------|
| <b>T<sub>0</sub></b>   |                 |                                               |                                          |                                                |                                               |                   |                   |                   |                   |                    |                   |
| 10 <sup>th</sup>       | r ≤0.048 %      | 120 (10)                                      | 0 (0; 1.5, 48.3)                         | 0 (0; 10.8, 94.5)                              | 1 (33.3; 1.8, 87.5)                           | 1.00 (0.54, 1.00) | 0.10 (0.08, 0.12) | 0.01 (0.00, 0.01) | 1.00 (0.97, 1.00) | 1.11 (1.09, 1.13)  | 0.00 (0.00, NaN)  |
| 20 <sup>th</sup>       | r ≤0.071%       | 239 (20)                                      | 0 (0; 1.5, 48.3)                         | 0 (0; 10.8, 94.5)                              | 1 (33.3; 1.8, 87.5)                           | 1.00 (0.54, 1.00) | 0.20 (0.18, 0.23) | 0.01 (0.00, 0.01) | 1.00 (0.98, 1.00) | 1.25 (1.22, 1.29)  | 0.00 (0.00, NaN)  |
| 30 <sup>th</sup>       | r ≤0.091%       | 358 (30)                                      | 0 (0; 1.5, 48.3)                         | 0 (0; 10.8, 94.5)                              | 1 (33.3; 1.8, 87.5)                           | 1.00 (0.54, 1.00) | 0.30 (0.28, 0.33) | 0.01 (0.00, 0.02) | 1.00 (0.99, 1.00) | 1.43 (1.38, 1.49)  | 0.00 (0.00, NaN)  |
| 40 <sup>th</sup>       | r ≤0.12%        | 478 (40)                                      | 0 (0; 1.5, 48.3)                         | 0 (0; 10.8, 94.5)                              | 1 (33.3; 1.8, 87.5)                           | 1.00 (0.54, 1.00) | 0.40 (0.37, 0.43) | 0.01 (0.00, 0.02) | 1.00 (0.99, 1.00) | 1.67 (1.60, 1.75)  | 0.00 (0.00, NaN)  |
| 50 <sup>th</sup>       | r ≤0.15%        | 597 (50)                                      | 0 (0; 1.5, 48.3)                         | 0 (0; 10.8, 94.5)                              | 1 (33.3; 1.8, 87.5)                           | 1.00 (0.54, 1.00) | 0.50 (0.47, 0.53) | 0.01 (0.00, 0.02) | 1.00 (0.99, 1.00) | 2.01 (1.90, 2.13)  | 0.00 (0.00, NaN)  |
| 60 <sup>th</sup>       | r ≤0.20%        | 716 (60)                                      | 0 (0; 1.5, 48.3)                         | 0 (0; 10.8, 94.5)                              | 1 (33.3; 1.8, 87.5)                           | 1.00 (0.54, 1.00) | 0.60 (0.57, 0.63) | 0.01 (0.00, 0.03) | 1.00 (0.99, 1.00) | 2.52 (2.35, 2.70)  | 0.00 (0.00, NaN)  |
| 70 <sup>th</sup>       | r ≤0.25%        | 836 (70)                                      | 3 (50; 13.9, 86.1 )                      | 0 (0; 10.8, 94.5)                              | 2 (66.7; 12.5, 98.2)                          | 0.50 (0.12, 0.88) | 0.70 (0.67, 0.73) | 0.01 (0.00, 0.02) | 1.00 (0.99, 1.00) | 1.67 (0.75, 3.74)  | 0.71 (0.32, 1.59) |
| 80 <sup>th</sup>       | r ≤0.35%        | 955 (80)                                      | 4 (66.7; 24.1, 94)                       | 0 (0; 10.8, 94.5)                              | 2 (66.7; 12.5, 98.2)                          | 0.33 (0.04, 0.78) | 0.80 (0.78, 0.82) | 0.01 (0.00, 0.03) | 1.00 (0.99, 1.00) | 1.67 (0.54, 5.21)  | 0.83 (0.47, 1.47) |
| 90 <sup>th</sup>       | r ≤0.55%        | 1074 (90)                                     | 5 (83.3; 36.5, 99.1)                     | 1 (100; 5.5, 100)                              | 2 (66.7; 12.5, 98.2)                          | 0.17 (0.00, 0.64) | 0.90 (0.88, 0.92) | 0.01 (0.00, 0.05) | 1.00 (0.99, 1.00) | 1.66 (0.28, 10.04) | 0.93 (0.65, 1.33) |
| 100 <sup>th</sup>      | r ≤3.1%         | 1194 (100)                                    | 6 (100; 51.7, 100)                       | 1 (100; 5.5, 100)                              | 3 (100; 31, 100)                              |                   |                   |                   |                   |                    |                   |
| <b>T<sub>0-3</sub></b> |                 |                                               |                                          |                                                |                                               |                   |                   |                   |                   |                    |                   |
| 10 <sup>th</sup>       | r ≤0.048        | 476 (10)                                      | 0 (0; 0.4,18.5)                          | 0 (0; 3.2, 69)                                 | 1 (16.7; 0.9, 63.5)                           | 1.00 (0.85, 1.00) | 0.10 (0.09, 0.11) | 0.01 (0.00, 0.01) | 1.00 (0.99, 1.00) | 1.11 (1.10, 1.12)  | 0.00 (0.00, NaN)  |
| 20 <sup>th</sup>       | r ≤0.071        | 950 (20)                                      | 1 (4.5; 0.2, 24.9)                       | 0 (0; 3.2, 69)                                 | 1 (16.7; 0.9, 63.5)                           | 0.95 (0.77, 1.00) | 0.20 (0.19, 0.21) | 0.01 (0.00, 0.01) | 1.00 (0.99, 1.00) | 1.19 (1.09, 1.31)  | 0.23 (0.03, 1.54) |
| 30 <sup>th</sup>       | r ≤0.090        | 1428 (30)                                     | 2 (9.1; 1.6, 30.6)                       | 0 (0; 3.2, 69)                                 | 1 (16.7; 0.9, 63.5)                           | 0.91 (0.71, 0.99) | 0.30 (0.29, 0.32) | 0.01 (0.00, 0.01) | 1.00 (0.99, 1.00) | 1.30 (1.14, 1.49)  | 0.30 (0.08, 1.13) |
| 40 <sup>th</sup>       | r ≤0.12         | 1899 (40)                                     | 3 (13.6; 3.6, 36)                        | 0 (0; 3.2, 69)                                 | 2 (33.3; 6, 75.9)                             | 0.86 (0.65, 0.97) | 0.40 (0.39, 0.42) | 0.01 (0.00, 0.01) | 1.00 (1.00, 1.00) | 1.44 (1.22, 1.71)  | 0.34 (0.12, 0.97) |
| 50 <sup>th</sup>       | r ≤0.14         | 2378 (50)                                     | 3 (13.6; 3.6, 36)                        | 0 (0; 3.2, 69)                                 | 2 (33.3; 6, 75.9)                             | 0.86 (0.65, 0.97) | 0.50 (0.49, 0.52) | 0.01 (0.00, 0.01) | 1.00 (1.00, 1.00) | 1.73 (1.46, 2.05)  | 0.27 (0.10, 0.78) |
| 60 <sup>th</sup>       | r ≤0.18         | 2851 (60)                                     | 5 (22.7; 8.7, 45.8)                      | 1 (33.3; 1.8, 87.5)                            | 3 (50; 13.9, 86.1)                            | 0.77 (0.55, 0.92) | 0.60 (0.59, 0.62) | 0.01 (0.01, 0.01) | 1.00 (1.00, 1.00) | 1.94 (1.54, 2.44)  | 0.38 (0.17, 0.82) |
| 70 <sup>th</sup>       | r ≤0.23         | 3325 (70)                                     | 7 (31.8; 14.7, 54.9)                     | 1 (33.3; 1.8, 87.5)                            | 4 (66.7; 24.1, 94)                            | 0.68 (0.45, 0.86) | 0.70 (0.69, 0.71) | 0.01 (0.01, 0.02) | 1.00 (1.00, 1.00) | 2.28 (1.71, 3.05)  | 0.45 (0.25, 0.84) |
| 80 <sup>th</sup>       | r ≤0.32         | 3798 (80)                                     | 14 (63.6; 40.8, 82)                      | 1 (33.3; 1.8, 87.5)                            | 5 (83.3; 36.5, 99.1)                          | 0.36 (0.17, 0.59) | 0.80 (0.79, 0.81) | 0.01 (0.00, 0.02) | 1.00 (0.99, 1.00) | 1.82 (1.05, 3.18)  | 0.79 (0.58, 1.09) |
| 90 <sup>th</sup>       | r ≤0.49         | 4273 (90)                                     | 18 (81.8; 59, 94)                        | 2 (66.7; 12.5, 98.2)                           | 6 (100; 51.7, 100)                            | 0.18 (0.05, 0.40) | 0.90 (0.89, 0.91) | 0.01 (0.00, 0.02) | 1.00 (0.99, 1.00) | 1.82 (0.75, 4.45)  | 0.91 (0.75, 1.11) |
| 100 <sup>th</sup>      | r ≤7.6          | 4748 (100)                                    | 22 (100; 81.5, 99.6)                     | 3 (100; 31, 96.8)                              | 6 (100; 51.7, 100)                            |                   |                   |                   |                   |                    |                   |

LCRAT: Lung Cancer risk Assessment, Sens: sensitivity, Spec: specificity, PPV: positive predictive value, NPV: negative predictive value, PLR: positive likelihood ratio, NLR: negative likelihood ratio.



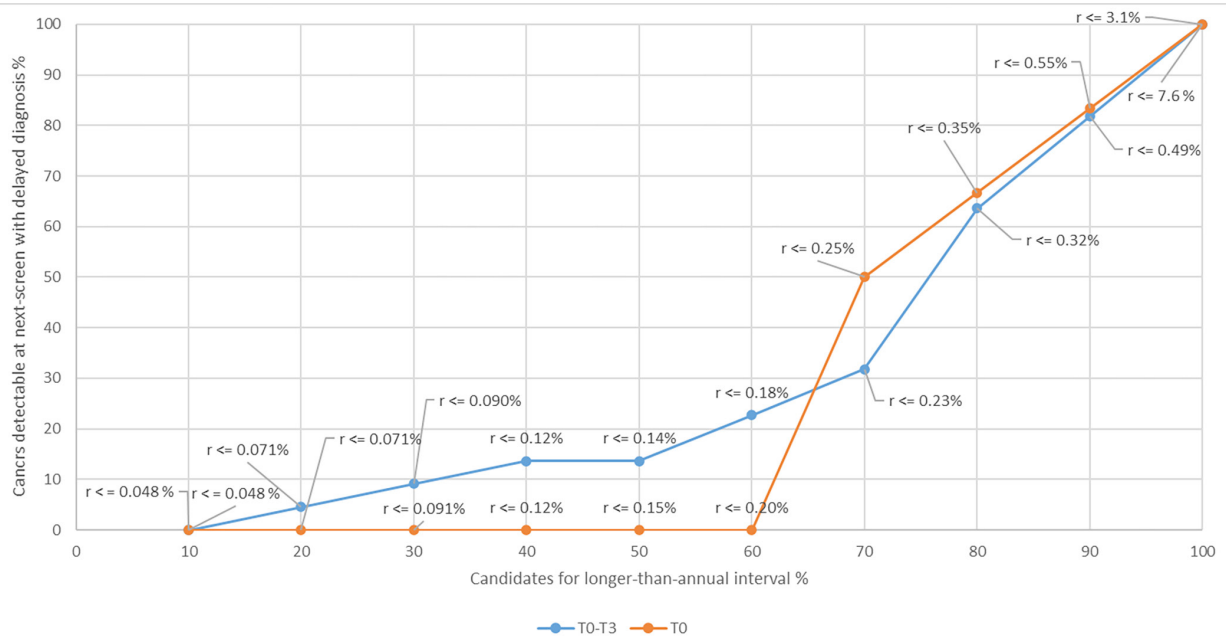

**Figure S3** Potential effect of risk thresholds from the Polynomial model in participants from all screening rounds of the LUSI Trial, eligible for the LCRAT+CT model. LCRAT: Lung Cancer risk Assessment Tool.

**Table S6** Observed incidence and mean predicted risk from the LCRAT, LCRAT+CT models

| Screening round                  | Observed incidence at next scan (%) | Mean predicted risk (%) |            | BS; Sp-Z (P value) <sup>†</sup> |                     |
|----------------------------------|-------------------------------------|-------------------------|------------|---------------------------------|---------------------|
|                                  |                                     | LCRAT                   | LCRAT + CT | LCRAT                           | LCRAT + CT          |
| T <sub>0</sub> to T <sub>3</sub> | 20/4904 (0.41)                      | 0.22                    | 0.21       | 0.004; 2.88 (0.004)             | 0.004; 3.09 (0.002) |
| First round (T <sub>0</sub> )    | 6/1194 (0.50)                       | 0.19                    | 0.18       | 0.005; 2.44 (0.015)             | 0.005; 2.68 (0.007) |
| Second round (T <sub>1</sub> )   | 3/1220 (0.25)                       | 0.21                    | 0.20       | 0.002; 0.27 (0.787)             | 0.002; 0.39 (0.693) |
| Third round (T <sub>2</sub> )    | 5/1262 (0.40)                       | 0.23                    | 0.22       | 0.004; 1.28 (0.201)             | 0.004; 1.36 (0.175) |
| Fourth round (T <sub>3</sub> )   | 6/1228 (0.49)                       | 0.24                    | 0.24       | 0.005; 1.82 (0.069)             | 0.005; 1.82 (0.069) |
| T <sub>1</sub> to T <sub>3</sub> | 14/3710 (0.38)                      | 0.23                    | 0.22       | 0.004; 1.97 (0.049)             | 0.004; 2.10 (0.036) |

<sup>†</sup>Brier Score, Spiegelhalter's Z-Score and Spiegelhalter's test p-value. <sup>‡</sup> For the purpose of evaluating model calibration, the observed lung cancer incidence in the subset of participants eligible for the Polynomial model was calculated only among those with a valid prediction from the model (i.e. after removing those with NA for risks).

**Table S7** Observed incidence and mean predicted risk from the Polynomial models

| Screening round                  | Observed incidence in [T <sub>n</sub> , T <sub>n+1</sub> ) <sup>‡</sup> (%) | Mean predicted risk (%) | BS; Sp-Z (P value) <sup>†</sup> |
|----------------------------------|-----------------------------------------------------------------------------|-------------------------|---------------------------------|
|                                  |                                                                             | Polynomial model        |                                 |
| First round (T <sub>0</sub> )    | 11/1889 (0.58)                                                              | 0.31                    | 0.006; 2.14 (0.032)             |
| Second round (T <sub>1</sub> )   | 11/1737 (0.63)                                                              | 0.33                    | 0.006; 2.28 (0.023)             |
| Third round (T <sub>2</sub> )    | 10/1728 (0.57)                                                              | 0.32                    | 0.006; 1.91 (0.055)             |
| Fourth round (T <sub>3</sub> )   | 10/1726 (0.58)                                                              | 0.36                    | 0.006; 1.71 (0.088)             |
| Fifth round (T <sub>4</sub> )    | 1/1754(0.057)                                                               | 0.32                    | 0.006; -1.95 (0.052)            |
| T <sub>1</sub> to T <sub>4</sub> | 32/6966 0.46                                                                | 0.33                    | 0.005; 1.98 (0.048)             |

<sup>†</sup>Brier Score, Spiegelhalter's Z-Score and Spiegelhalter's test p-value. <sup>‡</sup> For the purpose of evaluating model calibration, the observed lung cancer incidence in the subset of participants eligible for the Polynomial model was calculated only among those with a valid prediction from the model (i.e. after removing those with NA for risks).
